# Supplementary material for: Ex Vivo and In Vivo Mice Models to Study Blastocystis spp. Adhesion, Colonization and Pathology: Closer to Proving Koch's Postulates
Source: PLoS One. 2016 Aug 10;11(8):e0160458. doi: 10.1371/journal.pone.0160458 (PMC4979897; doi:10.1371/journal.pone.0160458)
Supplement: S1 Dataset — (XLSX) [file pone.0160458.s001.xlsx]

## Sheet: Figure 1
Figure 1A	Adhesion to porcine gastric mucin					Figure 1 C	Adhesion to tissue explants
n=3						n=5					n=6
ST7-H	ST7-B					ST7-B					ST7-H
2.30894	1.29661				Tissue	TI	CAE	PC	DC		TI	CAE	PC	DC
2.73793	0.798701					12	10	13	19		482	24	52	48
1.51724	0.942308					20	7	11	2		19	218	53	166
						7	4	19	9		260	64	45	153
						28	14	22	17		11	31	4	3
						5	49	15	53		26	23	37	12
						19	37	30	12		69	4	45	84
						155	17	16	79		189	14	193	99
						64	28	387	49		34	93	31	89
						53	27	80	31		21	9	255	100
						64	50	125	75		41	42	201	98
						60	48	86	74		44	33	165	160
						55	165	26	125		39	35	30	44
						97	245	107	202		15	9	100	93
						60	14	41	93		53	62	123	338
						43	13	180	27		80	104	75	507
							17	31			113	155	29	511
								39			48	51	48	505
								7			37	92	308	78
											23	79	351	409
											193	78	74	550
													242	65

## Sheet: Figure 2
	Figure 2	Adhesion to tissue explants
	Duration	1 HR							6 HR
		n=6							n=8
Tissue	CAE	control	ST7-B		control	ST7-H		CAE	control	ST7-B		control	ST7-H
		0.259	0.272		0.286	0.269			0.287	0.254		0.269	0.238
		0.282	0.271		0.338	0.318			0.272	0.25		0.346	0.294
		0.312	0.272		0.323	0.298			0.288	0.261		0.376	0.27
		0.383	0.29		0.284	0.281			0.273	0.262		0.366	0.271
		0.444	0.415		0.231	0.296			0.467	0.343		0.384	0.251
		0.473	0.492		0.437	0.407			0.443	0.299		0.415	0.344
									0.323	0.298		0.323	0.231
	PC	control	ST7-B		control	ST7-H			0.284	0.281		0.284	0.296
		0.273	0.258		0.292	0.279
		0.278	0.271		0.337	0.321		PC	control	ST7-B		control	ST7-H
		0.329	0.289		0.297	0.263			0.266	0.253		0.262	0.233
		0.417	0.391		0.277	0.276			0.266	0.25		0.313	0.253
		0.463	0.41		0.24	0.283			0.303	0.256		0.337	0.223
					0.443	0.396			0.271	0.247		0.346	0.22
	DC	control	ST7-B		control	ST7-H			0.4	0.344		0.36	0.243
		0.296	0.243		0.295	0.258			0.416	0.305		0.407	0.324
		0.291	0.252		0.312	0.29			0.297	0.263		0.297	0.24
		0.39	0.275		0.305	0.279			0.277	0.276		0.277	0.283
		0.322	0.269		0.278	0.301
		0.446	0.386		0.24	0.289		DC	control	ST7-B		control	ST7-H
		0.446	0.38		0.439	0.365			0.266	0.25		0.259	0.22
									0.266	0.238		0.295	0.237
	TI	control	ST7-B		control	ST7-H			0.286	0.232		0.34	0.219
		0.428	0.355		0.428	0.348			0.281	0.216		0.334	0.218
		0.504	0.377		0.527	0.354			0.395	0.266		0.332	0.244
		0.429	0.31		0.517	0.605			0.367	0.271		0.398	0.286
		0.52	0.437		0.542	0.348			0.305	0.279		0.305	0.24
		0.65	0.687		0.264	0.321			0.278	0.301		0.278	0.289
		1.164	0.713		0.72	0.717
								TI	control	ST7-B		control	ST7-H
									0.839	0.361		0.475	0.285
									0.522	0.374		0.682	0.294
									0.658	0.331		1.169	0.386
									0.686	0.398		1.01	0.435
									1.148	0.444		1.116	0.482
									1.196	0.391		0.84	0.361
									0.517	0.605		0.517	0.264
									0.542	0.348		0.542	0.321

## Sheet: Figure3
Figure 3 A	Histological grading
	Normal mice				DSS treated mice
	Control	ST7-B	ST7-H		Control	ST7-B	ST7-H
	0	0	1.5		0.5	0.5	15
	0	0	0		2	1	1
	0	0.5	0		1	5.5	4
			0.5		0.5	5	5
						5	7.5
						0.5	8
Figure 3C	Survival analysis
	Days	control	ST7-H	ST7-B		How the data are organized for survival analysis
	3	0				Each row represents one subject. The X values are time.The Y values are entered into two columns that define the treatment groups
	3	0				The Y value is "1" when the subject died at the specified time, and "0" when the subject's data was censored at that time
	3	0				(either because we don't know what happened after that timeor we do know but can't use the data because the protocol was not being followed).
	3	0
	3			0
	3			0
	3			0
	3			0
	3			0
	3			0
	3		0
	3		0
	3		0
	3		0
	3		0
	2		1
	2		1
	2		1
